# Supplementary material
Source: PubMed Central journal article supplement (PMC5605397)
Supplement: NIHMS873649-supplement-supplement_1.pdf [file NIHMS873649-supplement-supplement_1.pdf]

**eTable 1.** Comparison of Baseline Characteristics and Comorbidities of Case and Control Subjects in Included Studies

| Study                           | Age (y)        |               | Sex (% male)   |           | Coronary artery disease (% total) |            | Diabetes (% total) |           | Alcoholic Liver Disease/Alcohol use (%) |           | Child-Pugh (mean score) |           | Metformin use (%) |           | Angiotensin-converting enzyme inhibitor/aspirin (%) |           | Nonstatin lipid-lowering drug (%) |               |
|---------------------------------|----------------|---------------|----------------|-----------|-----------------------------------|------------|--------------------|-----------|-----------------------------------------|-----------|-------------------------|-----------|-------------------|-----------|-----------------------------------------------------|-----------|-----------------------------------|---------------|
|                                 | Statin-exposed | Unexposed     | Statin-exposed | Unexposed | Statin-exposed                    | Unexposed  | Statin-exposed     | Unexposed | Statin-exposed                          | Unexposed | Statin-exposed          | Unexposed | Statin-exposed    | Unexposed | Statin-exposed                                      | Unexposed | Statin-exposed                    | Unexposed     |
| Huang et al, 2016 (matched)     | 50.01          | 49.74         | 52.79          | 53.17     | 3.24 (MI)                         | 16.89 (MI) | 8.36               | 10.52     | NR                                      | NR        | NR                      | NR        | NR                | NR        | NR/63.27                                            | NR/51.02  | 3.59                              | 0.74          |
| Huang et al, 2016 (unmatched)   | 52.87          | 39.73         | 57.85          | 60.13     | 2.78 (MI)                         | 14.99 (MI) | 31.28              | 6.77      | NR                                      | NR        | NR                      | NR        | NR                | NR        | NR/68.78                                            | NR/43.99  | 3.84                              | 0.58          |
| Oliver et al, 2016*             | Ranges listed  | Ranges listed | 100            | 100       | NR                                | NR         | 15.1               | 16.7      | 58.2                                    | 59.6      | NR                      | NR        | NR                | NR        | NR                                                  | NR        | NR                                | NR            |
| Simon et al, 2016               | 53.5           | 52.5          | 96.16          | 95.37     | NR                                | NR         | 24.03              | 8.87      | 34.81                                   | 38.79     | NR                      | NR        | 34.19             | 10.91     | 65.7/NR                                             | 38.11/NR  | 15.53                             | 4.02          |
| Hsiang et al, 2015 (matched)    | 58.7           | 58.9          | 67.9           | 66.8      | 8.8                               | 6.1        | 45.1               | 45.4      | NR                                      | NR        | NR                      | NR        | 21.9              | 22.3      | 53.1/NR                                             | 51.8/NR   | 6.2 (Fibrate)                     | 5.9 (Fibrate) |
| Hsiang et al, 2015 (unmatched)  | 58.7           | 37.6          | 67.9           | 37.6      | 8.8                               | 0.1        | 45.1               | 7.4       | NR                                      | NR        | NR                      | NR        | 21.9              | 1.9       | 53.1/NR                                             | 3.5/NR    | 6.2 (Fibrate)                     | 0.2 (Fibrate) |
| Mohanty et al, 2015 (matched)   | 56 (med)       | 56 (med)      | 98.8           | 97.9      | 35.2                              | 30.7       | 53                 | 52.1      | 54.3                                    | 53.3      | NR                      | NR        | NR                | NR        | NR                                                  | NR        | NR                                | NR            |
| Mohanty et al, 2015 (unmatched) | 56 (med)       | 54 (med)      | 98.3           | 97.7      | 37.3                              | 11.9       | 54.8               | 28.9      | 52.5                                    | 56.6      | NR                      | NR        | NR                | NR        | NR                                                  | NR        | NR                                | NR            |
| Simon et al, 2015               | 54.2           | 50.1          | 58.6           | 71.2      | NR                                | NR         | 58.6               | 16.9      | NR                                      | NR        | NR                      | NR        | 10.3              | 48.2      | NR                                                  | NR        | 58.6                              | 3.3           |
| Yang et al, 2015 (matched)      | Ranges listed  | Ranges listed | 42             | 42        | NR                                | NR         | 55.6               | 55.6      | 7.6                                     | 10.4      | NR                      | NR        | 40.4              | 25.7      | 55.8/58.8                                           | 33.4/31.3 | 6.8                               | 1             |
| Yang et al, 2015 (unmatched)    | Ranges listed  | Ranges listed | 41.2           | 49.8      | NR                                | NR         | 57.3               | 24        | 7.5                                     | 10.9      | NR                      | NR        | 41.6              | 11        | 56.1/58.9                                           | 23.3/22.6 | 6.8                               | 0.6           |
| Kumar et al, 2014               | 59.79          | 59.64         | 54.32          | 54.32     | 43.21                             | 12.35      | 55.56              | 30.86     | 22.22                                   | 24.07     | 6.14                    | 6.26      | NR                | NR        | NR                                                  | NR        | NR                                | NR            |
| Abrales et al, 2016             | 57.42          | 57.62         | 65.2           | 67.9      | NR                                | NR         | 31.9               | 37.7      | 71                                      | 74.62     | 7.93                    | 7.68      | NR                | NR        | NR                                                  | NR        | NR                                | NR            |
| Pollo-Flores et al, 2015        | 56.5 (med)     | 58.5 (med)    | 57             | 50        | NR                                | NR         | NR                 | NR        | NR                                      | NR        | 10                      | 10.5      | NR                | NR        | NR                                                  | NR        | NR                                | NR            |
| Abrales et al, 2009             | 58             | 56            | 60.71          | 77.78     | NR                                | NR         | NR                 | NR        | 39.29                                   | 44.44     | 6.2                     | 6.9       | NR                | NR        | NR                                                  | NR        | NR                                | NR            |

\*Oliver study compared cirrhosis vs no cirrhosis: stain-exposed = cirrhosis, unexposed = no cirrhosis  
y = year; med = median; NR = not recorded; MI = myocardial infarction

**eTable 2.** Quality of Included Studies – Newcastle-Ottawa Scale for Cohort Studies

| Quality assessment criteria                                               | Acceptable (*)                                                                          | Huang 2016 | Oliver 2016 | Simon 2016 | Hsiang 2015 | Mohanty 2015 | Simon 2015 | Yang 2015 | Kumar 2014 | Chang 2017 | Bang 2016 |
|---------------------------------------------------------------------------|-----------------------------------------------------------------------------------------|------------|-------------|------------|-------------|--------------|------------|-----------|------------|------------|-----------|
| <b>Selection</b>                                                          |                                                                                         |            |             |            |             |              |            |           |            |            |           |
| Representativeness of exposed cohort?                                     | Representative of average adult in community                                            | *          | *           | *          | *           | *            | *          | *         | *          | *          | *         |
| Selection of the non-exposed cohort?                                      | Drawn from same community as exposed cohort                                             | *          | *           | *          | *           | *            | *          | *         | *          | *          | *         |
| Ascertainment of intervention                                             | Secure record, secure interview                                                         | -          | -           | -          | -           | *            | *          | -         | -          | -          | -         |
| Demonstration that outcome of interest was not present at start of study? | Baseline of chronic liver disease versus progression/decompensation                     | *          | *           | *          | *           | *            | *          | *         | *          | *          | *         |
| <b>Comparability</b>                                                      |                                                                                         |            |             |            |             |              |            |           |            |            |           |
| Study controls for age and at least 3 additional risk factors?            | Study controls for age and variety of other risk factors; details shown in Table 1 (**) | **         | **          | **         | **          | **           | **         | **        | **         | **         | **        |
| <b>Outcome</b>                                                            |                                                                                         |            |             |            |             |              |            |           |            |            |           |
| Assessment of outcome?                                                    | Record linkage                                                                          | *          | *           | *          | *           | *            | *          | *         | *          | *          | *         |
| Was follow-up long enough for outcome to occur?                           | Follow-up > 3 months                                                                    | *          | *           | *          | *           | *            | *          | *         | *          | *          | *         |
| Adequacy of follow-up of cohorts?                                         | Complete follow-up, or subjects lost to follow-up unlikely to introduce bias            | *          | *           | *          | *           | *            | *          | *         | *          | *          | *         |
| <b>Overall Quality Score (Maximum = 9)</b>                                |                                                                                         | <b>8</b>   | <b>8</b>    | <b>8</b>   | <b>8</b>    | <b>9</b>     | <b>9</b>   | <b>8</b>  | <b>8</b>   |            |           |

Ovid

Database(s): Embase 1988 to 2016 Week 32, Ovid MEDLINE(R) In-Process & Other Non-Indexed Citations and Ovid MEDLINE(R) 1946 to Present, EBM Reviews - Cochrane Central Register of Controlled Trials July 2016, EBM Reviews - Cochrane Database of Systematic Reviews 2005 to August 03, 2016

Search Strategy:

| #  | Searches                                                                                                                                                                                                                                                                                                                                                                                                           | Results |
|----|--------------------------------------------------------------------------------------------------------------------------------------------------------------------------------------------------------------------------------------------------------------------------------------------------------------------------------------------------------------------------------------------------------------------|---------|
| 1  | hydroxymethylglutaryl coenzyme A reductase inhibitor/                                                                                                                                                                                                                                                                                                                                                              | 66720   |
| 2  | Hydroxymethylglutaryl-CoA Reductase Inhibitors/                                                                                                                                                                                                                                                                                                                                                                    | 73277   |
| 3  | ("HMG CoA reductase inhibitor*" or "hmg coenzyme a reductase inhibitor*" or "hydroxymethylglutaryl coa reductase inhibitor*" or "hydroxymethylglutaryl coenzyme A reductase inhibitor*" or "hydroxymethylglutaryl-coa inhibitor*" or "hydroxymethylglutaryl-coenzyme a inhibitor*" or statin or statins or vastatin*).mp.                                                                                          | 131547  |
| 4  | exp Simvastatin/<br>(avastinee or cholestat or clinfar or colastatina or colestricon or covastin or denan or epistatin or esvat or ethicol or eucor or ifistatin or kavelor or klonastin or kolestevan or "l 644128" or l644128 or lipecor or lipex or lipinorm or liponorm or lipovas or lodales or medipo or mersivas or "mk 733" or mk733 or normofat or                                                        | 39371   |
| 5  | "nor-vastina" or orovas or rechol or simbado or simcard or simchol or simovil or simtin or simvacor or simvahex or simvalord or simvastar or simvastatin or simvata or simvatin or simvor or simvotin or sinvacor or sinvastatin or sinvinolin or sivastin or starzoco or synvinolin or torio or valemia or vasilip or vasotenal or vazim or vidastat or zimmex or zocor or "zocor forte" or zocord or zovast).mp. | 44289   |
| 6  | exp Pravastatin/<br>(astin or bristacol or cholespar or "cs 514" or cs514 or "cs-514" or elisor or epatostantin or eptastatin or eptastatine or kenstatin or lipemol or lipidal or liplat or lipostat or liprevil or mevalotin or novales or prareduct or prascalend or prastan or                                                                                                                                 | 21644   |
| 7  | prava or pravachol or pravacol or pravaselect or pravasin or pravasine or pravastatin or pravator or pravyl or "rms 431" or rms431 or "rms-431" or sanaprav or selektine or selipran or "sq 31000" or sq31000 or stanidine or vasopran or vasten or xipral).mp.                                                                                                                                                    | 24239   |
| 8  | exp Lovastatin/<br>("6 methylcompactin" or altocor or altoprev or artein or belvas or birotin or cholestra or cysin or ellanco or elstatin or "l 654969" or lipdip or lipivas or lofacol or lomar or lostatin or lovacel or lovacol or lovalip or lovalord or lovastan or                                                                                                                                          | 25315   |
| 9  | lovastatin or lovasterol or lovastin or lovatadin or lowachol or lozutin or medostatin or mevacor or meverstin or mevinacor or mevinolin or "mk 0803" or "mk 803" or mk0803 or mk803 or "monacolin K" or "monakolin k" or "msd 803" or neolipid or nergadan or ovasta or rodatin or rovacor or taucor).mp.                                                                                                         | 21007   |
| 10 | exp Atorvastatin Calcium/                                                                                                                                                                                                                                                                                                                                                                                          | 34761   |
| 11 | (atorvastatin or atovarol or cardyl or "ci 981" or ci981 or "ci-981" or glustar or lipibec or lipitor or liprimar or liptonorm or lowlipen or sortis or storvas or tahor or                                                                                                                                                                                                                                        | 40892   |

|                                                                                                                                                                                                                                                                                                                                                                                                        |                                                                                                                        |
|--------------------------------------------------------------------------------------------------------------------------------------------------------------------------------------------------------------------------------------------------------------------------------------------------------------------------------------------------------------------------------------------------------|------------------------------------------------------------------------------------------------------------------------|
| torvast or totalip or xarator or "ym 548" or ym548 or zarator).mp.                                                                                                                                                                                                                                                                                                                                     |                                                                                                                        |
| 12 exp fluindostatin/<br>(canef or cranoc or fluindostatin or fluvastatin or "fractal lp" or lescol or "lescol lp"<br>13 or "lescol xl" or leucol or lochol or locol or "sri 62320" or sri62320 or vastin or "xu<br>62320" or xu62320).mp.                                                                                                                                                             | 8167<br>10752                                                                                                          |
| 14 exp Rosuvastatin Calcium/<br>15 (crestor or rosuvas or rosuvastatin or "s 4522" or s4522 or "zd 4522" or<br>zd4522).mp.                                                                                                                                                                                                                                                                             | 12846<br>15153                                                                                                         |
| 16 or/1-15                                                                                                                                                                                                                                                                                                                                                                                             | 180389                                                                                                                 |
| 17 Chronic Disease/ and Liver Diseases/<br>18 (chronic* adj3 (liver or hepatic) adj3 disease*).mp.                                                                                                                                                                                                                                                                                                     | 6115<br>45740                                                                                                          |
| 19 exp liver cirrhosis/<br>20 (cirrheses or cirrhosis or ((fibrosis or fibroses) and (liver or hepatic))).mp.                                                                                                                                                                                                                                                                                          | 182120<br>284733                                                                                                       |
| 21 exp Hepatitis B/<br>22 ("hepatitis B" or "serum hepatitis" or "hippie hepatitis" or "injection hepatitis" or<br>"hepatitis type B").mp.                                                                                                                                                                                                                                                             | 124564<br>202140                                                                                                       |
| 23 exp Hepatitis C/<br>24 ("hepatitis c" or "parenterally transmitted non a non b hepatitis" or "pt-nanbh").mp.                                                                                                                                                                                                                                                                                        | 143961<br>198352                                                                                                       |
| 25 exp Liver Diseases, Alcoholic/<br>26 (alcohol* adj3 (liver or hepatic* or hepatit* or cirrhos*)).mp.                                                                                                                                                                                                                                                                                                | 30740<br>64857                                                                                                         |
| 27 Fatty Liver/<br>28 exp nonalcoholic fatty liver/<br>29 ("fatty liver" or steatohepatitis or ((NAFLD or NASH) and (liver* or hepat*)) or<br>steatohepatitides or (liver adj2 steatos*) or "visceral steatos*).mp.                                                                                                                                                                                    | 44712<br>26933<br>80399                                                                                                |
| 30 or/17-29                                                                                                                                                                                                                                                                                                                                                                                            | 647158                                                                                                                 |
| 31 16 and 30                                                                                                                                                                                                                                                                                                                                                                                           | 4182                                                                                                                   |
| 32 exp evidence based medicine/<br>33 exp meta analysis/<br>34 exp Meta-Analysis as Topic/<br>35 exp "systematic review"/<br>36 exp controlled study/<br>37 exp Randomized Controlled Trial/<br>38 exp triple blind procedure/<br>39 exp Double-Blind Method/<br>40 exp Single-Blind Method/<br>41 exp latin square design/<br>42 exp Placebos/<br>43 exp Placebo Effect/<br>44 exp comparative study/ | 909803<br>185121<br>43698<br>111422<br>5178428<br>825901<br>134<br>376320<br>59991<br>331<br>302774<br>9084<br>2634347 |

|                                                                                                                                                                                                                                                                                                                                                                                                                                                                                                                                                                                                                                                                                                                                                                                                                                                                                                                                                                                                                                                                                                                                                                                                                                                                                                                                                                                                                                                                                                                                                                                                                                                                                                                                                                                                                                                                                                                                                            |          |
|------------------------------------------------------------------------------------------------------------------------------------------------------------------------------------------------------------------------------------------------------------------------------------------------------------------------------------------------------------------------------------------------------------------------------------------------------------------------------------------------------------------------------------------------------------------------------------------------------------------------------------------------------------------------------------------------------------------------------------------------------------------------------------------------------------------------------------------------------------------------------------------------------------------------------------------------------------------------------------------------------------------------------------------------------------------------------------------------------------------------------------------------------------------------------------------------------------------------------------------------------------------------------------------------------------------------------------------------------------------------------------------------------------------------------------------------------------------------------------------------------------------------------------------------------------------------------------------------------------------------------------------------------------------------------------------------------------------------------------------------------------------------------------------------------------------------------------------------------------------------------------------------------------------------------------------------------------|----------|
| 45 exp intervention studies/                                                                                                                                                                                                                                                                                                                                                                                                                                                                                                                                                                                                                                                                                                                                                                                                                                                                                                                                                                                                                                                                                                                                                                                                                                                                                                                                                                                                                                                                                                                                                                                                                                                                                                                                                                                                                                                                                                                               | 28789    |
| 46 exp Cohort Studies/                                                                                                                                                                                                                                                                                                                                                                                                                                                                                                                                                                                                                                                                                                                                                                                                                                                                                                                                                                                                                                                                                                                                                                                                                                                                                                                                                                                                                                                                                                                                                                                                                                                                                                                                                                                                                                                                                                                                     | 1949868  |
| 47 exp longitudinal study/                                                                                                                                                                                                                                                                                                                                                                                                                                                                                                                                                                                                                                                                                                                                                                                                                                                                                                                                                                                                                                                                                                                                                                                                                                                                                                                                                                                                                                                                                                                                                                                                                                                                                                                                                                                                                                                                                                                                 | 304816   |
| 48 exp retrospective study/                                                                                                                                                                                                                                                                                                                                                                                                                                                                                                                                                                                                                                                                                                                                                                                                                                                                                                                                                                                                                                                                                                                                                                                                                                                                                                                                                                                                                                                                                                                                                                                                                                                                                                                                                                                                                                                                                                                                | 1075748  |
| 49 exp prospective study/                                                                                                                                                                                                                                                                                                                                                                                                                                                                                                                                                                                                                                                                                                                                                                                                                                                                                                                                                                                                                                                                                                                                                                                                                                                                                                                                                                                                                                                                                                                                                                                                                                                                                                                                                                                                                                                                                                                                  | 841241   |
| 50 exp population research/                                                                                                                                                                                                                                                                                                                                                                                                                                                                                                                                                                                                                                                                                                                                                                                                                                                                                                                                                                                                                                                                                                                                                                                                                                                                                                                                                                                                                                                                                                                                                                                                                                                                                                                                                                                                                                                                                                                                | 76861    |
| 51 exp observational study/                                                                                                                                                                                                                                                                                                                                                                                                                                                                                                                                                                                                                                                                                                                                                                                                                                                                                                                                                                                                                                                                                                                                                                                                                                                                                                                                                                                                                                                                                                                                                                                                                                                                                                                                                                                                                                                                                                                                | 118830   |
| 52 exp clinical trial/                                                                                                                                                                                                                                                                                                                                                                                                                                                                                                                                                                                                                                                                                                                                                                                                                                                                                                                                                                                                                                                                                                                                                                                                                                                                                                                                                                                                                                                                                                                                                                                                                                                                                                                                                                                                                                                                                                                                     | 1809867  |
| 53 clinical study/                                                                                                                                                                                                                                                                                                                                                                                                                                                                                                                                                                                                                                                                                                                                                                                                                                                                                                                                                                                                                                                                                                                                                                                                                                                                                                                                                                                                                                                                                                                                                                                                                                                                                                                                                                                                                                                                                                                                         | 75663    |
| 54 exp Evaluation Studies/                                                                                                                                                                                                                                                                                                                                                                                                                                                                                                                                                                                                                                                                                                                                                                                                                                                                                                                                                                                                                                                                                                                                                                                                                                                                                                                                                                                                                                                                                                                                                                                                                                                                                                                                                                                                                                                                                                                                 | 257219   |
| 55 exp Evaluation Studies as Topic/                                                                                                                                                                                                                                                                                                                                                                                                                                                                                                                                                                                                                                                                                                                                                                                                                                                                                                                                                                                                                                                                                                                                                                                                                                                                                                                                                                                                                                                                                                                                                                                                                                                                                                                                                                                                                                                                                                                        | 985788   |
| 56 exp correlational study/                                                                                                                                                                                                                                                                                                                                                                                                                                                                                                                                                                                                                                                                                                                                                                                                                                                                                                                                                                                                                                                                                                                                                                                                                                                                                                                                                                                                                                                                                                                                                                                                                                                                                                                                                                                                                                                                                                                                | 19782    |
| 57 exp case-control studies/                                                                                                                                                                                                                                                                                                                                                                                                                                                                                                                                                                                                                                                                                                                                                                                                                                                                                                                                                                                                                                                                                                                                                                                                                                                                                                                                                                                                                                                                                                                                                                                                                                                                                                                                                                                                                                                                                                                               | 932912   |
| 58 exp confidence interval/                                                                                                                                                                                                                                                                                                                                                                                                                                                                                                                                                                                                                                                                                                                                                                                                                                                                                                                                                                                                                                                                                                                                                                                                                                                                                                                                                                                                                                                                                                                                                                                                                                                                                                                                                                                                                                                                                                                                | 144338   |
| 59 exp proportional hazards model/<br>((evidence adj based) or (meta adj analys*) or (systematic* adj3 review*) or<br>(control* adj3 study) or (control* adj3 trial) or (randomized adj3 study) or<br>(randomized adj3 trial) or (randomised adj3 study) or (randomised adj3 trial) or<br>"pragmatic clinical trial" or (doubl* adj blind*) or (doubl* adj mask*) or (singl*<br>adj blind*) or (singl* adj mask*) or (tripl* adj blind*) or (tripl* adj mask*) or<br>(trebl* adj blind*) or (trebl* adj mask*) or "latin square" or placebo* or nocebo* or<br>"comparative study" or "comparative survey" or "comparative analysis" or<br>(intervention* adj2 study) or (intervention* adj2 trial) or cohort* or "longitudinal<br>study" or "longitudinal survey" or "longitudinal analysis" or "longitudinal<br>evaluation" or longitudinal* or ((retrospective or "ex post facto") adj3 (study or<br>survey or analysis or design)) or retrospectiv* or "prospective study" or<br>"prospective survey" or "prospective analysis" or prospectiv* or (population adj3<br>stud* or survey* or analys* or research)) or ("follow-up" or followup) adj (stud*<br>or survey or analysis)) or ((observation or observational) adj (study or survey or<br>analysis)) or "clinical study" or "clinical trial" or "evaluation study" or "evaluation<br>survey" or "evaluation analysis" or ((correlation* adj2 study) or (correlation* adj2<br>analys*)) or "case control study" or "case base study" or "case referent study" or<br>"case referent study" or "case referent study" or "case compeer study" or "case<br>comparison study" or "matched case control" or "confidence interval" or (hazard*<br>adj (model* or analys* or regression or ratio or ratios)) or "Cox model" or "Cox<br>multivariate analyses" or "Cox multivariate analysis" or "Cox regression" or "Cox<br>survival analyses" or "Cox survival analysis" or "Cox survival model").mp.pt. | 125372   |
| 60                                                                                                                                                                                                                                                                                                                                                                                                                                                                                                                                                                                                                                                                                                                                                                                                                                                                                                                                                                                                                                                                                                                                                                                                                                                                                                                                                                                                                                                                                                                                                                                                                                                                                                                                                                                                                                                                                                                                                         | 14070838 |
| 61 or/32-60                                                                                                                                                                                                                                                                                                                                                                                                                                                                                                                                                                                                                                                                                                                                                                                                                                                                                                                                                                                                                                                                                                                                                                                                                                                                                                                                                                                                                                                                                                                                                                                                                                                                                                                                                                                                                                                                                                                                                | 14928775 |
| 62 31 and 61                                                                                                                                                                                                                                                                                                                                                                                                                                                                                                                                                                                                                                                                                                                                                                                                                                                                                                                                                                                                                                                                                                                                                                                                                                                                                                                                                                                                                                                                                                                                                                                                                                                                                                                                                                                                                                                                                                                                               | 2293     |
| 63 (exp animals/ or exp nonhuman/) not exp humans/                                                                                                                                                                                                                                                                                                                                                                                                                                                                                                                                                                                                                                                                                                                                                                                                                                                                                                                                                                                                                                                                                                                                                                                                                                                                                                                                                                                                                                                                                                                                                                                                                                                                                                                                                                                                                                                                                                         | 8529098  |
| 64 ((alpaca or alpacas or amphibian or amphibians or animal or animals or antelope or<br>armadillo or armadillos or avian or baboon or baboons or beagle or beagles or bee                                                                                                                                                                                                                                                                                                                                                                                                                                                                                                                                                                                                                                                                                                                                                                                                                                                                                                                                                                                                                                                                                                                                                                                                                                                                                                                                                                                                                                                                                                                                                                                                                                                                                                                                                                                 | 7479056  |

or bees or bird or birds or bison or bovine or buffalo or buffaloes or buffalos or "c elegans" or "Caenorhabditis elegans" or camel or camels or canine or canines or carp or cats or cattle or chick or chicken or chickens or chicks or chimp or chimpanze or chimpanzees or chimps or cow or cows or "D melanogaster" or "dairy calf" or "dairy calves" or deer or dog or dogs or donkey or donkeys or drosophila or "Drosophila melanogaster" or duck or duckling or ducklings or ducks or equid or equids or equine or equines or feline or felines or ferret or ferrets or finch or finches or fish or flatworm or flatworms or fox or foxes or frog or frogs or "fruit flies" or "fruit fly" or "G mellonella" or "Galleria mellonella" or geese or gerbil or gerbils or goat or goats or goose or gorilla or gorillas or hamster or hamsters or hare or hares or heifer or heifers or horse or horses or insect or insects or jellyfish or kangaroo or kangaroos or kitten or kittens or lagomorph or lagomorphs or lamb or lambs or llama or llamas or macaque or macaques or macaw or macaws or marmoset or marmosets or mice or minipig or minipigs or mink or minks or monkey or monkeys or mouse or mule or mules or nematode or nematodes or octopus or octopuses or orangutan or "orang-utan" or orangutans or "orang-utans" or oxen or parrot or parrots or pig or pigeon or pigeons or piglet or piglets or pigs or porcine or primate or primates or quail or rabbit or rabbits or rat or rats or reptile or reptiles or rodent or rodents or ruminant or ruminants or salmon or sheep or shrimp or slug or slugs or swine or tamarin or tamarins or toad or toads or trout or urchin or urchins or vole or voles or waxworm or waxworms or worm or worms or xenopus or "zebra fish" or zebrafish) not (human or humans)).mp.

|                                                                                                                                                                                                                                                                                                                                                                                                                                                                                                                   |      |
|-------------------------------------------------------------------------------------------------------------------------------------------------------------------------------------------------------------------------------------------------------------------------------------------------------------------------------------------------------------------------------------------------------------------------------------------------------------------------------------------------------------------|------|
| 65 62 not (63 or 64)                                                                                                                                                                                                                                                                                                                                                                                                                                                                                              | 2142 |
| limit 65 to (editorial or erratum or letter or note or addresses or autobiography or bibliography or biography or blogs or comment or dictionary or directory or interactive tutorial or interview or lectures or legal cases or legislation or news or newspaper article or overall or patient education handout or periodical index or portraits or published erratum or video-audio media or webcasts) [Limit not valid in Embase,Ovid MEDLINE(R),Ovid MEDLINE(R) In-Process,CCTR,CDSR; records were retained] | 158  |
| 67 from 66 keep 1-136                                                                                                                                                                                                                                                                                                                                                                                                                                                                                             | 136  |
| 68 65 not 67                                                                                                                                                                                                                                                                                                                                                                                                                                                                                                      | 2006 |
| 69 remove duplicates from 68                                                                                                                                                                                                                                                                                                                                                                                                                                                                                      | 1709 |

## Scopus

- 1 TITLE-ABS-KEY("6 methylcompactin" OR altocor OR altoprev OR artein OR astin OR atorvastatin OR atovarol OR avastinee OR belvas OR birotin OR bristacol OR canef OR cardyl OR cholespar OR cholestat OR cholestra OR "ci 981" OR ci981 OR "ci-981" OR clinfar OR colastatina OR colestricon OR covastin OR cranoc OR crestor OR "cs 514" OR cs514 OR "cs-514" OR cysin OR denan OR elisor OR ellanco OR elstatin OR epatostantin OR epistatin OR eptastatin OR eptastatine OR esvat OR ethicol OR eucor OR fluindostatin OR fluvastatin OR "fractal lp" OR glustar OR "HMG CoA reductase inhibitor\*" OR "hmg coenzyme a reductase inhibitor\*" OR "hydroxymethylglutaryl coa reductase inhibitor\*" OR "hydroxymethylglutaryl coenzyme A reductase inhibitor\*" OR "hydroxymethylglutaryl-coa inhibitor\*" OR "hydroxymethylglutaryl-coenzyme a inhibitor\*" OR ifistatin OR kavelor OR kenstatin OR klonastin OR kolestevan OR "l 644128" OR "l 654969" OR l644128 OR lescol OR "lescol lp" OR "lescol xl" OR leucol OR lipdip OR lipecor OR lipemol OR lipex OR lipibec OR lipidal OR lipinorm OR lipitor OR lipivas OR liplat OR liponorm OR lipostat OR lipovas OR liprevil OR liprimar OR liptonorm OR lochol OR locol OR lodales OR lofacol OR lomar OR lostatin OR lovacel OR lovacol OR lovalip OR lovalord OR lovastan OR lovastatin OR lovasterol OR lovastin OR lovatadin OR lowachol OR lowlipen OR lozutin OR medipo OR medostatin OR mersivas OR mevacor OR mevalotin OR meverstin OR mevinacor OR mevinolin OR "mk 0803" OR "mk 733" OR "mk 803" OR mk0803 OR mk733 OR mk803 OR "monacolin K" OR "monakolin k" OR "msd 803" OR neolipid OR nergadan OR normofat OR "nor-vastina" OR novales OR orovas OR ovasta OR prareduct OR prascolend OR prastan OR prava OR pravachol OR pravacol OR pravaselect OR pravasin OR pravasine OR pravastatin OR pravator OR pravyl OR rechol OR "rms 431" OR rms431 OR "rms-431" OR rodatin OR rosuvas OR rosuvastatin OR rovacor OR "s 4522" OR s4522 OR sanaprav OR selektine OR selipran OR simbado OR simcard OR simchol OR simovil OR simtin OR simvacor OR simvahex OR simvalord OR simvostar OR simvastatin OR simvata OR simvatin OR simvor OR simvotin OR sinvacor OR sinvastatin OR sinvinolin OR sivastin OR sortis OR "sq 31000" OR sq31000 OR "sri 62320" OR sri62320 OR stanidine OR starzoco OR statin OR statins OR storvas OR synvinolin OR tahor OR taucor OR torio OR torvast OR totalip OR valemia OR vasilip OR vasopran OR vasotenal OR vastatin\* OR vasten OR vastin OR vazim OR vidastat OR xarator OR xipral OR "xu 62320" OR xu62320 OR "ym 548" OR ym548 OR zarator OR "zd 4522" OR zd4522 OR zimmex OR zocor OR "zocor forte" OR zocord OR zovast)
- 2 TITLE-ABS-KEY(((fibrosis or fibroses) and (liver or hepatic)) OR ((NAFLD or NASH) and (liver\* or hepat\*))) OR (alcohol\* W/3 (liver or hepatic\* or hepatit\* or cirrhos\*)) OR (chronic\* W/3 (liver or hepatic) W/3 disease\*) OR (liver W/2 steatos\*) OR cirrhoses OR cirrhosis OR "fatty liver" OR "hepatitis B" OR "hepatitis c" OR "hepatitis type B" OR "hippie hepatitis" OR "injection hepatitis" OR "parenterally transmitted non a non b hepatitis" OR "pt-nanbh" OR "serum hepatitis" OR steatohepatitides OR steatohepatitis OR "visceral steatos\*")
- 3 TITLE-ABS-KEY((evidence W/1 based) OR (meta W/1 analys\*) OR (systematic\* W/3 review\*) OR (control\* W/3 study) OR (control\* W/3 trial) OR (randomized W/3 study) OR (randomized W/3 trial) OR (randomised W/3 study) OR (randomised W/3 trial) OR

"pragmatic clinical trial" OR (doubl\* W/1 blind\*) OR (doubl\* W/1 mask\*) OR (singl\* W/1 blind\*) OR (singl\* W/1 mask\*) OR (tripl\* W/1 blind\*) OR (tripl\* W/1 mask\*) OR (trebl\* W/1 blind\*) OR (trebl\* W/1 mask\*) OR "latin square" OR placebo\* OR nocebo\* OR "comparative study" OR "comparative survey" OR "comparative analysis" OR (intervention\* W/2 study) OR (intervention\* W/2 trial) OR cohort\* OR "longitudinal study" OR "longitudinal survey" OR "longitudinal analysis" OR "longitudinal evaluation" OR longitudinal\* OR ((retrospective OR "ex post facto") W/3 (study OR survey OR analysis OR design)) OR retrospectiv\* OR "prospective study" OR "prospective survey" OR "prospective analysis" OR prospectiv\* OR (population W/3 (stud\* or survey\* or analys\* or research)) OR ("follow-up" or followup) W/1 (stud\* or survey or analysis) OR ((observation or observational) W/1 (study or survey or analysis)) OR "clinical study" OR "clinical trial" OR "evaluation study" OR "evaluation survey" OR "evaluation analysis" OR ((correlation\* W/2 study) OR (correlation\* W/2 analys\*)) OR "case control study" OR "case base study" OR "case referent study" OR "case referent study" OR "case compeer study" OR "case comparison study" OR "matched case control" OR "confidence interval" OR (hazard\* W/1 (model\* OR analys\* OR regression or ratio or ratios)) OR "Cox model" OR "Cox multivariate analyses" OR "Cox multivariate analysis" OR "Cox regression" OR "Cox survival analyses" OR "Cox survival analysis" OR "Cox survival model")

4 1 and 2 and 3

5 TITLE-ABS-KEY((alpaca OR alpacas OR amphibian OR amphibians OR animal OR animals OR antelope OR armadillo OR armadillos OR avian OR baboon OR baboons OR beagle OR beagles OR bee OR bees OR bird OR birds OR bison OR bovine OR buffalo OR buffaloes OR buffalos OR "c elegans" OR "Caenorhabditis elegans" OR camel OR camels OR canine OR canines OR carp OR cats OR cattle OR chick OR chicken OR chickens OR chicks OR chimp OR chimpanze OR chimpanzees OR chimps OR cow OR cows OR "D melanogaster" OR "dairy calf" OR "dairy calves" OR deer OR dog OR dogs OR donkey OR donkeys OR drosophila OR "Drosophila melanogaster" OR duck OR duckling OR ducklings OR ducks OR equid OR equids OR equine OR equines OR feline OR felines OR ferret OR ferrets OR finch OR finches OR fish OR flatworm OR flatworms OR fox OR foxes OR frog OR frogs OR "fruit flies" OR "fruit fly" OR "G mellonella" OR "Galleria mellonella" OR geese OR gerbil OR gerbils OR goat OR goats OR goose OR gorilla OR gorillas OR hamster OR hamsters OR hare OR hares OR heifer OR heifers OR horse OR horses OR insect OR insects OR jellyfish OR kangaroo OR kangaroos OR kitten OR kittens OR lagomorph OR lagomorphs OR lamb OR lambs OR llama OR llamas OR macaque OR macaques OR macaw OR macaws OR marmoset OR marmosets OR mice OR minipig OR minipigs OR mink OR minks OR monkey OR monkeys OR mouse OR mule OR mules OR nematode OR nematodes OR octopus OR octopuses OR orangutan OR "orangutan" OR orangutans OR "orang-utans" OR oxen OR parrot OR parrots OR pig OR pigeon OR pigeons OR piglet OR piglets OR pigs OR porcine OR primate OR primates OR quail OR rabbit OR rabbits OR rat OR rats OR reptile OR reptiles OR rodent OR rodents OR ruminant OR ruminants OR salmon OR sheep OR shrimp OR slug OR slugs OR swine OR tamarin OR tamarins OR toad OR toads OR trout OR urchin OR urchins OR vole OR voles OR waxworm



- OR waxworms OR worm OR worms OR xenopus OR "zebra fish" OR zebrafish) AND NOT  
(human OR humans))
- 6 4 and not 5
- 7 DOCTYPE(le) OR DOCTYPE(ed) OR DOCTYPE(bk) OR DOCTYPE(er) OR DOCTYPE(no) OR  
DOCTYPE(sh)
- 8 6 and not 7
- 9 PMID(0\*) OR PMID(1\*) OR PMID(2\*) OR PMID(3\*) OR PMID(4\*) OR PMID(5\*) OR PMID(6\*)  
OR PMID(7\*) OR PMID(8\*) OR PMID(9\*)
- 10 8 and not 9

Web of Science

- 1 **TOPIC:** (("6 methylcompactin" OR altocor OR altoprev OR artein OR astin OR atorvastatin OR atovarol OR avastinee OR belvas OR birotin OR bristacol OR canef OR cardyl OR cholepar OR cholestat OR cholestra OR "ci 981" OR ci981 OR "ci-981" OR clinfar OR colastatina OR colestricon OR covastin OR cranoc OR crestor OR "cs 514" OR cs514 OR "cs-514" OR cysin OR denan OR elisor OR ellanco OR elstatin OR epatostantin OR epistatin OR eptastatin OR eptastatine OR esvat OR ethicol OR eucor OR fluindostatin OR fluvastatin OR "fractal lp" OR glustar OR "HMG CoA reductase inhibitor\*" OR "hmg coenzyme a reductase inhibitor\*" OR "hydroxymethylglutaryl coa reductase inhibitor\*" OR "hydroxymethylglutaryl coenzyme A reductase inhibitor\*" OR "hydroxymethylglutaryl-coa inhibitor\*" OR "hydroxymethylglutaryl-coenzyme a inhibitor\*" OR ifistatin OR kavelor OR kenstatin OR klonastin OR kolestevan OR "l 644128" OR "l 654969" OR l644128 OR lescol OR "lescol lp" OR "lescol xl" OR leucol OR lipdip OR lipecor OR lipemol OR lipex OR lipibec OR lipidal OR lipinorm OR lipitor OR lipivas OR liplat OR liponorm OR lipostat OR lipovas OR liprevil OR liprimar OR liptonorm OR lochol OR locol OR lodales OR lofacol OR lomar OR lostatin OR lovacel OR lovacol OR lovalip OR lovalord OR lovastan OR lovastatin OR lovasterol OR lovastin OR lovatadin OR lowachol OR lowlipen OR lozutin OR medipo OR medostatin OR mersivas OR mevacor OR mevalotin OR meverstin OR mevinacor OR mevinolin OR "mk 0803" OR "mk 733" OR "mk 803" OR mk0803 OR mk733 OR mk803 OR "monacolin K" OR "monakolin k" OR "msd 803" OR neolipid OR nergadan OR normofat OR "nor-vastina" OR novales OR orovas OR ovasta OR prareduct OR prascolend OR prastan OR prava OR pravachol OR pravacol OR pravaselect OR pravasin OR pravasine OR pravastatin OR pravator OR pravyl OR rechol OR "rms 431" OR rms431 OR "rms-431" OR rodatin OR rosuvas OR rosuvastatin OR rovacor OR "s 4522" OR s4522 OR sanaprav OR selektine OR selipran OR simbado OR simcard OR simchol OR simovil OR simtin OR simvacor OR simvahex OR simvalord OR simvastar OR simvastatin OR simvata OR simvatin OR simvor OR simvotin OR sinvacor OR sinvastatin OR sinvinolin OR sivastin OR sortis OR "sq 31000" OR sq31000 OR "sri 62320" OR sri62320 OR stanidine OR starzoco OR statin OR statins OR storvas OR synvinolin OR tahor OR taucor OR torio OR torvast OR totalip OR valemia OR vasilip OR vasopran OR vasotenal OR vastatin\* OR vasten OR vastin OR vazim OR vidastat OR xarator OR xipral OR "xu 62320" OR xu62320 OR "ym 548" OR ym548 OR zarator OR "zd 4522" OR zd4522 OR zimmex OR zocor OR "zocor forte" OR zocord OR zovast)) **AND TOPIC:** (((fibrosis or fibroses) and (liver or hepatic)) OR ((NAFLD or NASH) and (liver\* or hepat\*)) OR (alcohol\* NEAR/3 (liver or hepatic\* or hepatit\* or cirrhos\*)) OR (chronic\* NEAR/3 (liver or hepatic) NEAR/3 disease\*) OR (liver NEAR/2 steatos\*) OR cirrhoses OR cirrhosis OR "fatty liver" OR "hepatitis B" OR "hepatitis c" OR "hepatitis type B" OR

"hippie hepatitis" OR "injection hepatitis" OR "parenterally transmitted non a non b hepatitis" OR "pt-nanbh" OR "serum hepatitis" OR steatohepatitides OR steatohepatitis OR "visceral steatos\*") AND **TOPIC:** (((evidence NEAR/1 based) OR (meta NEAR/1 analys\*) OR (systematic\* NEAR/3 review\*) OR (control\* NEAR/3 study) OR (control\* NEAR/3 trial) OR (randomized NEAR/3 study) OR (randomized NEAR/3 trial) OR (randomised NEAR/3 study) OR (randomised NEAR/3 trial) OR "pragmatic clinical trial" OR (doubl\* NEAR/1 blind\*) OR (doubl\* NEAR/1 mask\*) OR (singl\* NEAR/1 blind\*) OR (singl\* NEAR/1 mask\*) OR (tripl\* NEAR/1 blind\*) OR (tripl\* NEAR/1 mask\*) OR (trebl\* NEAR/1 blind\*) OR (trebl\* NEAR/1 mask\*) OR "latin square" OR placebo\* OR nocebo\* OR "comparative study" OR "comparative survey" OR "comparative analysis" OR (intervention\* NEAR/2 study) OR (intervention\* NEAR/2 trial) OR cohort\* OR "longitudinal study" OR "longitudinal survey" OR "longitudinal analysis" OR "longitudinal evaluation" OR longitudinal\* OR ((retrospective OR "ex post facto") NEAR/3 (study OR survey OR analysis OR design)) OR retrospectiv\* OR "prospective study" OR "prospective survey" OR "prospective analysis" OR prospectiv\* OR (population NEAR/3 (stud\* or survey\* or analys\* or research)) OR (("follow-up" or followup) NEAR/1 (stud\* or survey or analysis)) OR ((observation or observational) NEAR/1 (study or survey or analysis)) OR "clinical study" OR "clinical trial" OR "evaluation study" OR "evaluation survey" OR "evaluation analysis" OR ((correlation\* NEAR/2 study) OR (correlation\* NEAR/2 analys\*)) OR "case control study" OR "case base study" OR "case referent study" OR "case referent study" OR "case referent study" OR "case compeer study" OR "case comparison study" OR "matched case control" OR "confidence interval" OR (hazard\* NEAR/1 (model\* OR analys\* OR regression or ratio or ratios)) OR "Cox model" OR "Cox multivariate analyses" OR "Cox multivariate analysis" OR "Cox regression" OR "Cox survival analyses" OR "Cox survival analysis" OR "Cox survival model")) AND **DOCUMENT TYPES:** (Article OR Abstract of Published Item OR Meeting Abstract OR Proceedings Paper OR Review) Indexes=SCI-EXPANDED Timespan=All years

- 2 TS=((alpaca OR alpacas OR amphibian OR amphibians OR animal OR animals OR antelope OR armadillo OR armadillos OR avian OR baboon OR baboons OR beagle OR beagles OR bee OR bees OR bird OR birds OR bison OR bovine OR buffalo OR buffaloes OR buffalos OR "c elegans" OR "Caenorhabditis elegans" OR camel OR camels OR canine OR canines OR carp OR cats OR cattle OR chick OR chicken OR chickens OR chicks OR chimp OR chimpanze OR chimpanzees OR chimps OR cow OR cows OR "D melanogaster" OR "dairy calf" OR "dairy calves" OR deer OR dog OR dogs OR donkey OR donkeys OR drosophila OR "Drosophila melanogaster" OR duck OR duckling OR ducklings OR ducks OR equid OR equids OR equine OR equines OR feline OR felines OR ferret OR ferrets OR finch OR finches OR fish OR flatworm OR flatworms OR fox OR foxes OR frog OR frogs OR "fruit flies" OR "fruit fly" OR "G mellonella" OR "Galleria mellonella" OR geese OR gerbil OR gerbils OR goat OR goats OR goose OR gorilla OR gorillas OR hamster OR hamsters

OR hare OR hares OR heifer OR heifers OR horse OR horses OR insect OR insects  
OR jellyfish OR kangaroo OR kangaroos OR kitten OR kittens OR lagomorph OR  
lagomorphs OR lamb OR lambs OR llama OR llamas OR macaque OR macaques OR  
macaw OR macaws OR marmoset OR marmosets OR mice OR minipig OR minipigs  
OR mink OR minks OR monkey OR monkeys OR mouse OR mule OR mules OR  
nematode OR nematodes OR octopus OR octopuses OR orangutan OR "orang-utan"  
OR orangutans OR "orang-utans" OR oxen OR parrot OR parrots OR pig OR pigeon  
OR pigeons OR piglet OR piglets OR pigs OR porcine OR primate OR primates OR  
quail OR rabbit OR rabbits OR rat OR rats OR reptile OR reptiles OR rodent OR  
rodents OR ruminant OR ruminants OR salmon OR sheep OR shrimp OR slug OR  
slugs OR swine OR tamarin OR tamarins OR toad OR toads OR trout OR urchin OR  
urchins OR vole OR voles OR waxworm OR waxworms OR worm OR worms OR  
xenopus OR "zebra fish" OR zebrafish) NOT (human OR humans)) Indexes=SCI-  
EXPANDED Timespan=All years

3 1 NOT 2

4 PMID=(0\* or 1\* or 2\* or 3\* or 4\* or 5\* or 6\* or 7\* or 8\* or 9\*)

5 3 NOT 4

|                   | Random sequence generation (selection bias) | Allocation concealment (selection bias) | Blinding of participants and personnel (performance bias) | Blinding of outcome assessment (detection bias) | Incomplete outcome data (attrition bias) | Selective reporting (reporting bias) | Other bias |
|-------------------|---------------------------------------------|-----------------------------------------|-----------------------------------------------------------|-------------------------------------------------|------------------------------------------|--------------------------------------|------------|
| Abraldes 2009     | +                                           | +                                       | +                                                         | +                                               | +                                        | +                                    | +          |
| Abraldes 2016     | +                                           | ?                                       | +                                                         | +                                               | +                                        | +                                    | +          |
| Pollo-Flores 2015 | +                                           | ?                                       | ?                                                         | +                                               | +                                        | +                                    | +          |
